# Supplementary material for: Exploring Patient Awareness and Perceptions of the Appropriate Use of Antibiotics: A Mixed-Methods Study
Source: PubMed Central journal article supplement (PMC5745466; doi:10.3390/antibiotics6040023), 2017-10-31
Supplement: antibiotics-06-00023-s001.pdf [file antibiotics-06-00023-s001.pdf]

Article

# Exploring patient awareness and perceptions of the appropriate use of antibiotics: a mixed-methods study

Marion E. Davis <sup>1,\*</sup>, Tsai-Ling Liu <sup>1</sup>, Yhenneko J. Taylor <sup>1</sup>, Lisa Davidson <sup>2</sup>, Monica Schmid <sup>1</sup>, Traci Yates <sup>1</sup>, Janice Scotton <sup>3</sup>, and Melanie D. Spencer <sup>1</sup>

## Description

1. Please tell us about yourself (Select All That Apply)
  - I am the patient. I have taken an antibiotic within the past 2 years
  - I am the parent of a child who has taken an antibiotic within the past 2 years
  - I am caregiver to a person who has taken an antibiotic within the past 2 years
  - I am the patient, parent of a child, or caregiver to a person who has taken an antibiotic more than 2 years ago
  - I have never taken an antibiotic
  - I don't know
2. How long has it been since you were given an order for an antibiotic?
  - Less than 6 months
  - 6 to 12 months
  - More than 1 year
  - I have never gotten an order for an antibiotic
  - I don't know

## Knowledge of Appropriate Use of Antibiotics

3. How well do antibiotics work for treating these kinds of infections?

|                                                                        | Not well at all | Not too well | Somewhat well | Very well | Extremely well | I don't know |
|------------------------------------------------------------------------|-----------------|--------------|---------------|-----------|----------------|--------------|
|                                                                        | 1               | 2            | 3             | 4         | 5              |              |
| Infections from bacteria such as strep throat or some sinus infections |                 |              |               |           |                |              |
| Infections from a virus such as the flu or common cold                 |                 |              |               |           |                |              |

## Experiences with Use of Antibiotics

4. When an antibiotic was ordered, were you taught how to take it by a provider?
  - Yes, I was taught how to take it (such as take it with food or take it for 7 days)
  - No
  - I don't know
  - I have never been given an order for an antibiotic
5. Have any of these been a problem for you?

|                                                                                      | Yes | No | I don't know |
|--------------------------------------------------------------------------------------|-----|----|--------------|
| The cost of an antibiotic                                                            |     |    |              |
| Finding a provider who will write an order for an antibiotic                         |     |    |              |
| Taking time away from work, school, caregiving or other matters to go see a provider |     |    |              |

### Expectations of Providers Regarding Antibiotics

6. Do you think that some providers are more willing than others to write an order for an antibiotic?
  - Yes
  - No
  - I don't know
7. When you have a cough or a common cold, do you expect your provider to give you any of these?

|                                                         | Yes | No | I don't know |
|---------------------------------------------------------|-----|----|--------------|
| Tips on how to help me feel better                      |     |    |              |
| An antibiotic                                           |     |    |              |
| An order for something to help my symptoms              |     |    |              |
| Information to assure me that it is not something worse |     |    |              |

8. You ask your provider for an antibiotic. Your provider tells you that an antibiotic is not needed for your illness. What would you do? Please select all that apply.
  - Do what my provider says even if I don't get an antibiotic
  - Ask a provider in the same office to give me an antibiotic
  - Go to another Carolinas HealthCare System place/office to try to get an antibiotic
  - Go to a non-Carolinas HealthCare System place/office to try to get an antibiotic
  - Search for the antibiotic online and order it
  - File a complaint
9. If they do not give you an antibiotic, what could your provider do to make you feel better? Please select all that apply.
  - Suggest an over-the-counter medicine that could help my symptoms
  - Give me an order for a medicine that could help my symptoms
  - Tell me where I could learn more about my illness (such as a website or handout)
  - Call me in 24 to 48 hours to see if I feel better
  - Give me coupons for an over-the-counter medicine that could help my symptoms
  - Other: (Please tell us what would help you to feel better)

### Level of Awareness of Antibiotic Resistance

10. Some antibiotics no longer work to fight infections. This problem is called antibiotic resistance or a superbug. How much have you heard about this problem?
  - Great deal
  - Fair amount
  - Some information
  - Nothing
  - I don't know

### Perceptions of Outcomes of Antibiotic Resistance

11. Do you think any of these will happen when a person takes an antibiotic that is not needed to treat their illness?

|                                                                                   | Yes | No | I don't know |
|-----------------------------------------------------------------------------------|-----|----|--------------|
| The antibiotic will not work well in treating that person's illness the next time |     |    |              |
| It can weaken how well the antibiotic will work for other people in the future    |     |    |              |

### Demographics

12. Are you Male or Female?
- Male
  - Female
  - Prefer not to answer
13. In what year were you born? \_\_\_\_\_
14. What is the last year or grade of school that you finished?
- Grade school
  - High School but did not Finish
  - High School Diploma or GED
  - Business, Technical or Vocational School
  - Some College
  - Two-Year or Associates College Degree
  - Four-Year College Degree
  - Graduate Degree
15. Are you Spanish, Hispanic, or Latino / Latina origin or descent?
- Yes
  - No
16. What is your race? Please choose one or more
- White
  - Black or African American
  - Asian
  - Native Hawaiian or Other Pacific Islander
  - American Indian or Alaska Native
  - Prefer not to answer
  - Other (Please write your race below)

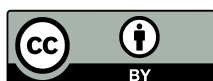

© 2017 by the authors. Submitted for possible open access publication under the terms and conditions of the Creative Commons Attribution (CC-BY) license (<http://creativecommons.org/licenses/by/4.0/>).
